# Supplementary material for: Rational Design of a Glycoconjugate Vaccine against Group A Streptococcus
Source: PubMed Central journal article supplement (PMC7696035; doi:10.3390/ijms21228558), 2020-11-13
Supplement: ijms-21-08558-s001.pdf [file ijms-21-08558-s001.pdf]

# Rational Design of a Glycoconjugate Vaccine against Group A *Streptococcus*

Roberta Di Benedetto <sup>1</sup>, Francesca Mancini <sup>1</sup>, Martina Carducci <sup>1</sup>, Gianmarco Gasperini <sup>1</sup>, Danilo Gomes Moriel <sup>1</sup>, Allan Saul <sup>1,†</sup>, Francesca Necchi <sup>1</sup>, Rino Rappuoli <sup>2</sup> and Francesca Micoli <sup>1,\*</sup>

<sup>1</sup> GSK Vaccines Institute for Global Health (GVGH), Via Fiorentina 1, 53100 Siena, Italy; roberta.x.dibenedetto@gsk.com (R.D.B.); francesca.x.mancini@gsk.com (F.M.); martina.x.carducci@gsk.com (M.C.); gianmarco.x.gasperini@gsk.com (G.G); danilo.x.moriel-gomes@gsk.com (D.G.M); allan.saul@honorary.burnet.edu.au (A.S.); francesca.x.necchi@gsk.com (F.N.)

<sup>2</sup> GSK, Via Fiorentina 1, 53100 Siena, Italy; rino.r.rappuoli@gsk.com (R.R.)

\* Correspondence: francesca.x.micoli@gsk.com; Tel.: +39-0577-53-9087

† Now retired.

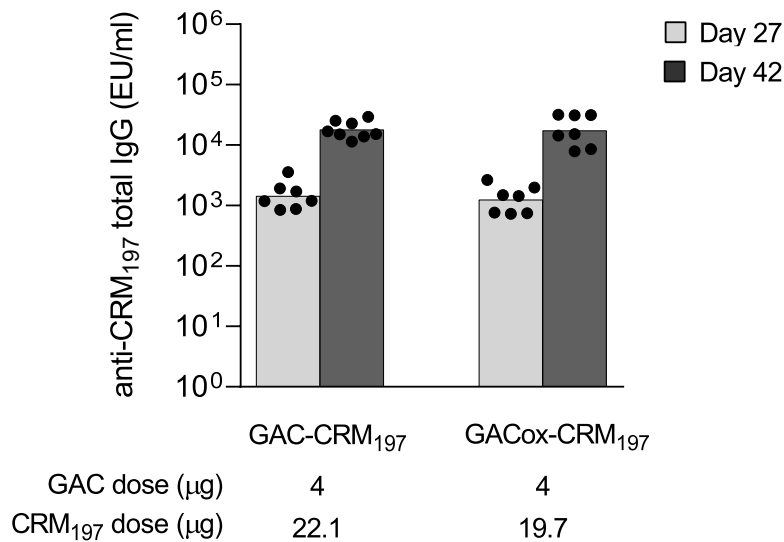

**Figure S1.** Immunogenicity of GAC when conjugated to CRM<sub>197</sub> through different chemistries. CD1 mice were immunized i.p. at day 0 and 28 with 4 µg GAC/dose formulated with 2 mg/mL Alhydrogel. Summary graph of anti-CRM<sub>197</sub> specific IgG geometric mean units (bars) and individual antibody levels (dots) is reported (CRM<sub>197</sub> used as coating antigen). Mann-Whitney two-tailed test was performed to compare the response induced by the two immunization groups ( $p > 0.05$ ).

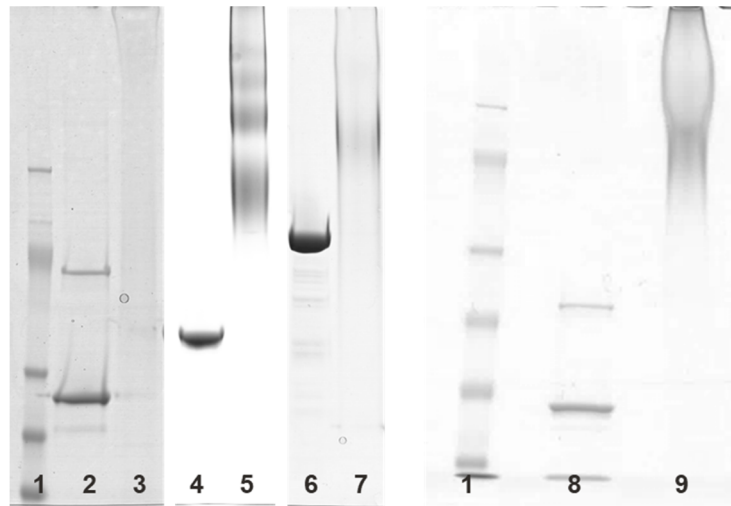

**Figure S2.** Characterization by SDS-PAGE analysis (3–8% Tris-acetate gel for GAS proteins conjugates, 7% Tris-acetate gel for CRM<sub>197</sub> conjugate) of the conjugation mixtures in comparison to corresponding unconjugated proteins. Ten µg of conjugates and 2 µg of unconjugated proteins were loaded per well. Lane 1: marker, lane 2: SLO; lane 3: SLO conjugate; lane 4: SpyAD; lane 5: SpyAD conjugate; lane 6: SpyCEP; lane 7: SpyCEP conjugate; lane 8: CRM<sub>197</sub>, lane 9: CRM<sub>197</sub> conjugate.

**Table S1.** DoE approach applied to GAC oxidation: summary of conditions tested and results obtained.

| Std | Run | Factor 1        | Factor 2                     | Factor 3 | Response 1    | Response 2            | Response 3 |
|-----|-----|-----------------|------------------------------|----------|---------------|-----------------------|------------|
|     |     | A:[PS]<br>mg/mL | B:[NaIO <sub>4</sub> ]<br>mM | C:pH     | Recovery<br>% | Oxidation GlcNAc<br>% | Size<br>Da |
| 5   | 1   | 2.8             | 2.4                          | 7.4      | 62            | 10.2                  | 6970       |
| 1   | 2   | 2.8             | 2.4                          | 5.6      | 69            | 13.5                  | 6970       |
| 20  | 3   | 5.5             | 5.3                          | 6.5      | 62            | 11.9                  | 6782       |
| 15  | 4   | 5.5             | 5.3                          | 6.5      | 76            | 12.7                  | 6766       |
| 2   | 5   | 8.2             | 2.4                          | 5.6      | 87            | 10.3                  | 6886       |
| 6   | 6   | 8.2             | 2.4                          | 7.4      | 78            | 8.5                   | 6927       |
| 16  | 7   | 5.5             | 5.3                          | 6.5      | 80            | 12.2                  | 6807       |
| 12  | 8   | 5.5             | 10.0                         | 6.5      | 88            | 16.7                  | 6625       |
| 4   | 9   | 8.2             | 8.0                          | 5.6      | 93            | 13.3                  | 6825       |
| 17  | 10  | 5.5             | 5.3                          | 6.5      | 78            | 12.8                  | 6784       |
| 14  | 11  | 5.5             | 5.3                          | 8.0      | 82            | 11.8                  | 6808       |
| 7   | 12  | 2.8             | 8.0                          | 7.4      | 77            | 14.4                  | 6764       |
| 3   | 13  | 2.8             | 8.0                          | 5.6      | 72            | 19.2                  | 6766       |
| 9   | 14  | 1.0             | 5.3                          | 6.5      | 70            | 19.4                  | 6447       |
| 11  | 15  | 5.5             | 0.5                          | 6.5      | 77            | nd                    | 7028       |
| 8   | 16  | 8.2             | 8.0                          | 7.4      | 80            | 17.8                  | 6726       |
| 13  | 17  | 5.5             | 5.3                          | 5.0      | 84            | 17.8                  | 6825       |
| 18  | 18  | 5.5             | 5.3                          | 6.5      | 76            | 14.9                  | 6774       |
| 10  | 19  | 10.0            | 5.3                          | 6.5      | 88            | 15.1                  | 6835       |
| 19  | 20  | 5.5             | 5.3                          | 6.5      | 88            | nd                    | 6694       |

**ANOVA for Response Surface Reduced Quadratic model**

**Analysis of variance table [Partial sum of squares - Type III]**

| Source            | Sum of Squares       | df    | Mean Square    | F Value        | p-value Prob > F |                 |
|-------------------|----------------------|-------|----------------|----------------|------------------|-----------------|
| Model             | 134,14               | 5     | 26,83          | 9,33           | 0,0008           | significant     |
| A-[PS]            | 15,35                | 1     | 15,35          | 5,34           | 0,0395           |                 |
| B-[NaIO4]         | 73,85                | 1     | 73,85          | 25,67          | 0,0003           |                 |
| C-pH              | 17,52                | 1     | 17,52          | 6,09           | 0,0296           |                 |
| AC                | 14,61                | 1     | 14,61          | 5,08           | 0,0437           |                 |
| A <sup>2</sup>    | 19,97                | 1     | 19,97          | 6,94           | 0,0218           |                 |
| Residual          | 34,52                | 12    | 2,88           |                |                  |                 |
| Lack of Fit       | 29,07                | 8     | 3,63           | 2,66           | 0,1798           | not significant |
| Pure Error        | 5,46                 | 4     | 1,36           |                |                  |                 |
| Cor Total         | 168,67               | 17    |                |                |                  |                 |
| Std. Dev.         |                      | 1,70  |                | R-Squared      |                  | 0,7953          |
| Mean              |                      | 14,04 |                | Adj R-Squared  |                  | 0,7100          |
| C.V. %            |                      | 12,08 |                | Pred R-Squared |                  | 0,4656          |
| PRESS             |                      | 90,14 |                | Adeq Precision |                  | 10,476          |
| -2 Log Likelihood |                      | 62,80 |                | BIC            |                  | 80,15           |
|                   |                      |       |                | AICc           |                  | 82,44           |
| Factor            | Coefficient Estimate | df    | Standard Error | 95% CI Low     | 95% CI High      | VIF             |
| Intercept         | 12,87                | 1     | 0,54           | 11,70          | 14,04            |                 |
| A-[PS]            | -1,06                | 1     | 0,46           | -2,06          | -0,060           | 1,00            |
| B-[NaIO4]         | 2,65                 | 1     | 0,52           | 1,51           | 3,78             | 1,01            |
| C-pH              | -1,13                | 1     | 0,46           | -2,13          | -0,13            | 1,00            |
| AC                | 1,35                 | 1     | 0,60           | 0,045          | 2,66             | 1,00            |
| A <sup>2</sup>    | 1,22                 | 1     | 0,46           | 0,21           | 2,22             | 1,01            |

**Figure S3.** Identification of optimal conditions for GAC oxidation: statistical analysis of the model for the DoE.

**Table S2.** DoE approach applied to conjugation of GACox to CRM<sub>197</sub>: summary of conditions tested and results obtained.

| Std | Run | Factor 1  | Factor 2                | Factor 3                 | Response 2                          | Response 3      | Response 4                                       |
|-----|-----|-----------|-------------------------|--------------------------|-------------------------------------|-----------------|--------------------------------------------------|
|     |     | A:[GACox] | B:[CRM <sub>197</sub> ] | C:[NaBH <sub>3</sub> CN] | w/w Ratio<br>GAC/CRM <sub>197</sub> | Recovered<br>PS | Unconjugated<br>CRM <sub>197</sub> in<br>Mixture |
|     |     | mg/mL     | mg/mL                   | mg/mL                    |                                     | %               | %                                                |
| 20  | 1   | 25        | 25                      | 25                       | 0.26                                | 21.1            | 0                                                |
| 8   | 2   | 40        | 40                      | 40                       | 0.28                                | 20.7            | 0                                                |
| 17  | 3   | 25        | 25                      | 25                       | 0.29                                | 23.1            | 0                                                |
| 15  | 4   | 25        | 25                      | 25                       | 0.29                                | 22.6            | 0                                                |
| 13  | 5   | 25        | 25                      | 10                       | 0.42                                | 35.4            | 0                                                |
| 6   | 6   | 40        | 10                      | 40                       | 0.49                                | 9.4             | 0                                                |
| 5   | 7   | 10        | 10                      | 40                       | 0.16                                | 12.8            | 0                                                |
| 4   | 8   | 40        | 40                      | 10                       | 0.43                                | 41.3            | 0                                                |
| 3   | 9   | 10        | 40                      | 10                       | 0.12                                | 41.2            | 33                                               |
| 12  | 10  | 25        | 40                      | 25                       | 0.34                                | 41.9            | 0                                                |
| 16  | 11  | 25        | 25                      | 25                       | 0.30                                | 22.2            | 0                                                |
| 14  | 12  | 25        | 25                      | 40                       | 0.25                                | 18.9            | 0                                                |
| 9   | 13  | 10        | 25                      | 25                       | 0.15                                | 32.9            | 0                                                |
| 1   | 14  | 10        | 10                      | 10                       | 0.27                                | 22.0            | 5                                                |
| 10  | 15  | 40        | 25                      | 25                       | 0.49                                | 25.6            | 3                                                |
| 11  | 16  | 25        | 10                      | 25                       | 0.47                                | 12.5            | 0                                                |
| 2   | 17  | 40        | 10                      | 10                       | 0.65                                | 9.2             | 16                                               |
| 18  | 18  | 25        | 25                      | 25                       | 0.33                                | 26.1            | 0                                                |
| 7   | 19  | 10        | 40                      | 40                       | 0.12                                | 30.8            | 11                                               |
| 19  | 20  | 25        | 25                      | 25                       | 0.34                                | 27.0            | 0                                                |

(a) **Response** **w/w ratio GAC/CRM<sub>197</sub>**

**ANOVA for Response Surface Linear model**

**Analysis of variance table [Partial sum of squares - Type III]**

| Source                   | Sum of Squares | df     | Mean Square | F Value        | p-value Prob > F |                 |
|--------------------------|----------------|--------|-------------|----------------|------------------|-----------------|
| Model                    | 0,32           | 3      | 0,11        | 43,45          | < 0.0001         | significant     |
| A-[GAC]                  | 0,23           | 1      | 0,23        | 94,44          | < 0.0001         |                 |
| B-[CRM <sub>197</sub> ]  | 0,056          | 1      | 0,056       | 22,64          | 0,0002           |                 |
| C-[NaBH <sub>3</sub> CN] | 0,033          | 1      | 0,033       | 13,28          | 0,0022           |                 |
| Residual                 | 0,039          | 16     | 2,455E-003  |                |                  |                 |
| Lack of Fit              | 0,035          | 11     | 3,153E-003  | 3,42           | 0,0926           | not significant |
| Pure Error               | 4,608E-003     | 5      | 9,216E-004  |                |                  |                 |
| Cor Total                | 0,36           | 19     |             |                |                  |                 |
| Std. Dev.                |                | 0,050  |             | R-Squared      |                  | 0,8907          |
| Mean                     |                | 0,32   |             | Adj R-Squared  |                  | 0,8702          |
| C.V. %                   |                | 15,32  |             | Pred R-Squared |                  | 0,8084          |
| PRESS                    |                | 0,069  |             | Adeq Precision |                  | 25,625          |
| -2 Log Likelihood        |                | -67,89 |             | BIC            |                  | -55,91          |
|                          |                |        |             | AICc           |                  | -57,23          |

  

| Factor                   | Coefficient Estimate | df | Standard Error | 95% CI Low | 95% CI High | VIF  |
|--------------------------|----------------------|----|----------------|------------|-------------|------|
| Intercept                | 0,32                 | 1  | 0,011          | 0,30       | 0,35        |      |
| A-[GAC]                  | 0,15                 | 1  | 0,016          | 0,12       | 0,19        | 1,00 |
| B-[CRM <sub>197</sub> ]  | -0,075               | 1  | 0,016          | -0,11      | -0,041      | 1,00 |
| C-[NaBH <sub>3</sub> CN] | -0,057               | 1  | 0,016          | -0,090     | -0,024      | 1,00 |

**Figure S4.** *Cont.*

| (b)                                                                   |                      | Response | Recovered PS % |                |                  |                 |
|-----------------------------------------------------------------------|----------------------|----------|----------------|----------------|------------------|-----------------|
| <b>ANOVA for Response Surface Linear model</b>                        |                      |          |                |                |                  |                 |
| <b>Analysis of variance table [Partial sum of squares - Type III]</b> |                      |          |                |                |                  |                 |
| Source                                                                | Sum of Squares       | df       | Mean Square    | F Value        | p-value Prob > F |                 |
| Model                                                                 | 1640,06              | 3        | 546,69         | 31,69          | < 0.0001         | significant     |
| A-[GAC]                                                               | 112,07               | 1        | 112,07         | 6,50           | 0,0215           |                 |
| B-[CRM <sub>197</sub> ]                                               | 1209,63              | 1        | 1209,63        | 70,11          | < 0.0001         |                 |
| C-[NaBH <sub>3</sub> CN]                                              | 318,36               | 1        | 318,36         | 18,45          | 0,0006           |                 |
| Residual                                                              | 276,05               | 16       | 17,25          |                |                  |                 |
| Lack of Fit                                                           | 248,85               | 11       | 22,62          | 4,16           | 0,0638           | not significant |
| Pure Error                                                            | 27,20                | 5        | 5,44           |                |                  |                 |
| Cor Total                                                             | 1916,11              | 19       |                |                |                  |                 |
| Std. Dev.                                                             |                      | 4,15     |                | R-Squared      |                  | 0,8559          |
| Mean                                                                  |                      | 24,83    |                | Adj R-Squared  |                  | 0,8289          |
| C.V. %                                                                |                      | 16,73    |                | Pred R-Squared |                  | 0,7342          |
| PRESS                                                                 |                      | 509,31   |                | Adeq Precision |                  | 21,521          |
| -2 Log Likelihood                                                     |                      | 109,25   |                | BIC            |                  | 121,24          |
|                                                                       |                      |          |                | AICc           |                  | 119,92          |
| Factor                                                                | Coefficient Estimate | df       | Standard Error | 95% CI Low     | 95% CI High      | VIF             |
| Intercept                                                             | 24,83                | 1        | 0,93           | 22,86          | 26,80            |                 |
| A-[GAC <sub>197</sub> ]                                               | -3,35                | 1        | 1,31           | -6,13          | -0,56            | 1,00            |
| B-[CRM]                                                               | 11,00                | 1        | 1,31           | 8,21           | 13,78            | 1,00            |
| C-[NaBH <sub>3</sub> CN]                                              | -5,64                | 1        | 1,31           | -8,43          | -2,86            | 1,00            |

**Figure S4.** Identification of optimal conditions for GACox conjugation to CRM<sub>197</sub>: statistical analysis of the models for GAC/CRM<sub>197</sub> w/w ratio (a) and GAC yield (b).
